# Supplementary material for: The Role of Physical Therapies in Wound Healing and Assisted Scarring
Source: MDPI journal article supplement (doi:10.3390/ijms24087487), 2023-04-19
Supplement: s1 [file s1]

## Supplementary Figure

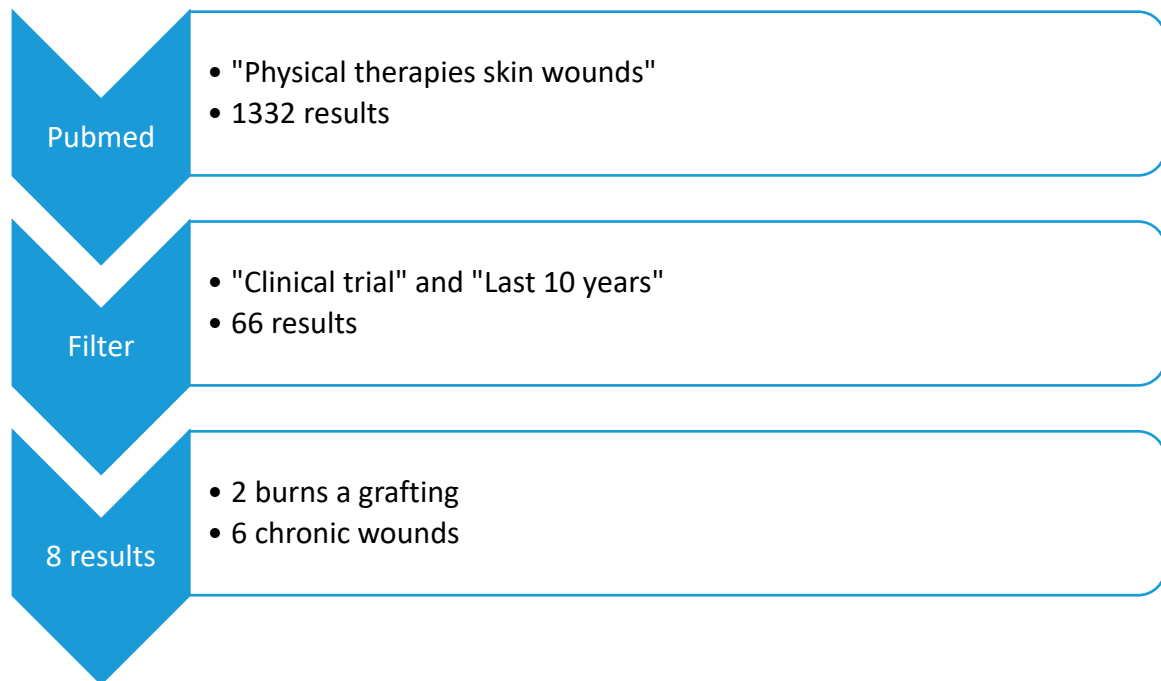

**Figure S1.** Clinical trial published of intervention with physical therapies in wound healing in pubmed.
